# Supplementary material
Source: PubMed Central journal article supplement (PMC4820011)
Supplement: NIHMS769868-supplement-Supplement_1.pdf [file NIHMS769868-supplement-Supplement_1.pdf]

All predictors, with categorical features represented as binary indicators

| Predictor Name  | Type   |
|-----------------|--------|
| CenterCodeAR045 | Binary |
| CenterCodeCA167 | Binary |
| CenterCodeFL072 | Binary |
| CenterCodeFL079 | Binary |
| CenterCodeFL141 | Binary |
| CenterCodeFL174 | Binary |
| CenterCodeFL227 | Binary |
| CenterCodeFL506 | Binary |
| CenterCodeGA102 | Binary |
| CenterCodeGA133 | Binary |
| CenterCodeIL008 | Binary |
| CenterCodeIL049 | Binary |
| CenterCodeIL086 | Binary |
| CenterCodeIL095 | Binary |
| CenterCodeIL102 | Binary |
| CenterCodeIL109 | Binary |
| CenterCodeIL252 | Binary |
| CenterCodeIL259 | Binary |
| CenterCodeIN112 | Binary |
| CenterCodeKS199 | Binary |
| CenterCodeMA162 | Binary |
| CenterCodeMD080 | Binary |
| CenterCodeME006 | Binary |
| CenterCodeME015 | Binary |
| CenterCodeMI168 | Binary |
| CenterCodeMI177 | Binary |
| CenterCodeMO083 | Binary |
| CenterCodeMO131 | Binary |
| CenterCodeMO138 | Binary |
| CenterCodeNC057 | Binary |
| CenterCodeNC081 | Binary |
| CenterCodeNC094 | Binary |
| CenterCodeNC131 | Binary |
| CenterCodeNC147 | Binary |
| CenterCodeNC176 | Binary |
| CenterCodeNH022 | Binary |
| CenterCodeNJ006 | Binary |
| CenterCodeNJ053 | Binary |
| CenterCodeNJ112 | Binary |

|                         |              |
|-------------------------|--------------|
| CenterCodeNJQ47         | Binary       |
| CenterCodeNJQ4X         | Binary       |
| CenterCodeNV171         | Binary       |
| CenterCodeOH046         | Binary       |
| CenterCodeOH192         | Binary       |
| CenterCodeOH195         | Binary       |
| CenterCodeOH218         | Binary       |
| CenterCodeOH224         | Binary       |
| CenterCodeOH351         | Binary       |
| CenterCodeOK042         | Binary       |
| CenterCodeOR028         | Binary       |
| CenterCodeOR02Y         | Binary       |
| CenterCodePA189         | Binary       |
| CenterCodePA194         | Binary       |
| CenterCodePA227         | Binary       |
| CenterCodePA239         | Binary       |
| CenterCodeSC031         | Binary       |
| CenterCodeTN158         | Binary       |
| CenterCodeTX072         | Binary       |
| CenterCodeTX081         | Binary       |
| CenterCodeTX097         | Binary       |
| CenterCodeTX252         | Binary       |
| CenterCodeTX388         | Binary       |
| CenterCodeTX540         | Binary       |
| CenterCodeTX917         | Binary       |
| CenterCodeVA031         | Binary       |
| CenterCodeVA03R         | Binary       |
| CenterCodeWV062         | Binary       |
| PatientGenderF          | Binary       |
| PatientGenderM          | Binary       |
| PatientGenderU          | Binary       |
| PatientAge              | Quantitative |
| PalliativeCareYes       | Binary       |
| ComplexCareYes          | Binary       |
| iHealArea               | Quantitative |
| Length                  | Quantitative |
| Width                   | Quantitative |
| Depth                   | Quantitative |
| ScaleCategory/Stage I   | Binary       |
| ScaleCategory/Stage II  | Binary       |
| ScaleCategory/Stage III | Binary       |

|                                                        |        |
|--------------------------------------------------------|--------|
| ScaleCategory/Stage IV                                 | Binary |
| ScaleFull Thickness                                    | Binary |
| ScaleFull Thickness With Exposed Support Structures    | Binary |
| ScaleFull Thickness Without Exposed Support Structures | Binary |
| ScaleGrade 0                                           | Binary |
| ScaleGrade 1                                           | Binary |
| ScaleGrade 2                                           | Binary |
| ScaleGrade 3                                           | Binary |
| ScaleGrade 4                                           | Binary |
| ScaleGrade 5                                           | Binary |
| ScalePartial Thickness                                 | Binary |
| ScaleSuspected Deep Tissue Injury                      | Binary |
| ScaleUnable to visualize wound bed                     | Binary |
| ScaleUnclassifiable                                    | Binary |
| ScaleUnstageable/Unclassified                          | Binary |
| TemperatureCool/Cold                                   | Binary |
| TemperatureHot                                         | Binary |
| TemperatureNo Abnormality                              | Binary |
| ExudateFoul Purulent                                   | Binary |
| ExudateFresh Blood                                     | Binary |
| ExudateGreen                                           | Binary |
| ExudateOther                                           | Binary |
| ExudatePurulent                                        | Binary |
| ExudateSanguineous                                     | Binary |
| ExudateSanguinous                                      | Binary |
| ExudateSero-sanguineous                                | Binary |
| ExudateSerosanguineous                                 | Binary |
| ExudateSerous                                          | Binary |
| ExudateYellow                                          | Binary |
| ExudateYellow/Green                                    | Binary |
| ExudateAmountCopious                                   | Binary |
| ExudateAmountLarge                                     | Binary |
| ExudateAmountMedium                                    | Binary |
| ExudateAmountModerate                                  | Binary |
| ExudateAmountNone                                      | Binary |
| ExudateAmountNone Present                              | Binary |
| ExudateAmountScant                                     | Binary |
| ExudateAmountSmall                                     | Binary |
| WoundMarginAttached to Wound Base                      | Binary |
| WoundMarginDistinct, outline attached                  | Binary |
| WoundMarginEpibole                                     | Binary |

|                                          |        |
|------------------------------------------|--------|
| WoundMarginFibrotic scar, thickened scar | Binary |
| WoundMarginFlat and Intact               | Binary |
| WoundMarginFlattened                     | Binary |
| WoundMarginIndistinct, non-visible       | Binary |
| WoundMarginIndistinct, nonvisable        | Binary |
| WoundMarginIndistinct, nonvisible        | Binary |
| WoundMarginLymphedema                    | Binary |
| WoundMarginNot Attached to Wound Base    | Binary |
| WoundMarginPunched out                   | Binary |
| WoundMarginThickened                     | Binary |
| WoundMarginThickened and Rolled Under    | Binary |
| WoundMarginUndefined                     | Binary |
| WoundMarginWell Defined                  | Binary |
| WoundMarginWell defined, not attached    | Binary |
| Epithialization1-25%                     | Binary |
| Epithialization26-50%                    | Binary |
| Epithialization51-75%                    | Binary |
| Epithialization76-100%                   | Binary |
| EpithializationNone                      | Binary |
| TunnelingN/A                             | Binary |
| TunnelingNo                              | Binary |
| TunnelingYes                             | Binary |
| UnderminingN/A                           | Binary |
| UnderminingNo                            | Binary |
| UnderminingYes                           | Binary |
| ExposedBoneN/A                           | Binary |
| ExposedBoneNo                            | Binary |
| ExposedBoneYes                           | Binary |
| ExposedJointN/A                          | Binary |
| ExposedJointNo                           | Binary |
| ExposedJointYes                          | Binary |
| ExposedMuscleN/A                         | Binary |
| ExposedMuscleNo                          | Binary |
| ExposedMuscleYes                         | Binary |
| ExposedTendonN/A                         | Binary |
| ExposedTendonNo                          | Binary |
| ExposedTendonYes                         | Binary |
| BrawnyIndurationN/A                      | Binary |
| BrawnyIndurationNo                       | Binary |
| BrawnyIndurationYes                      | Binary |
| EdemaN/A                                 | Binary |

|                    |        |
|--------------------|--------|
| EdemaNo            | Binary |
| EdemaYes           | Binary |
| ExcoriationN/A     | Binary |
| ExcoriationNo      | Binary |
| ExcoriationYes     | Binary |
| CallusN/A          | Binary |
| CallusNo           | Binary |
| CallusYes          | Binary |
| CrepitusN/A        | Binary |
| CrepitusNo         | Binary |
| CrepitusYes        | Binary |
| FluctuanceN/A      | Binary |
| FluctuanceNo       | Binary |
| FluctuanceYes      | Binary |
| FriableN/A         | Binary |
| FriableNo          | Binary |
| FriableYes         | Binary |
| RashN/A            | Binary |
| RashNo             | Binary |
| RashYes            | Binary |
| AtrophieBlancheN/A | Binary |
| AtrophieBlancheNo  | Binary |
| AtrophieBlancheYes | Binary |
| CyanosisN/A        | Binary |
| CyanosisNo         | Binary |
| CyanosisYes        | Binary |
| EcchymosisN/A      | Binary |
| EcchymosisNo       | Binary |
| EcchymosisYes      | Binary |
| ErythemaN/A        | Binary |
| ErythemaNo         | Binary |
| ErythemaYes        | Binary |
| HemosiderosisN/A   | Binary |
| HemosiderosisNo    | Binary |
| HemosiderosisYes   | Binary |
| PallorN/A          | Binary |
| PallorNo           | Binary |
| PallorYes          | Binary |
| RuborN/A           | Binary |
| RuborNo            | Binary |
| RuborYes           | Binary |

|                                       |              |
|---------------------------------------|--------------|
| TendernessOnPalpationNo               | Binary       |
| TendernessOnPalpationYes              | Binary       |
| Slough1-25%                           | Binary       |
| Slough26-50%                          | Binary       |
| Slough51-75%                          | Binary       |
| Slough76-100%                         | Binary       |
| SloughNone                            | Binary       |
| SloughLessThan20N/A                   | Binary       |
| SloughLessThan20No                    | Binary       |
| SloughLessThan20Yes                   | Binary       |
| DelayedRecurrenceNo                   | Binary       |
| DelayedRecurrenceYes                  | Binary       |
| ResultOfAccidentN/A                   | Binary       |
| ResultOfAccidentNo                    | Binary       |
| ResultOfAccidentYes                   | Binary       |
| WoundRecurrenceNo                     | Binary       |
| WoundRecurrenceYes                    | Binary       |
| ClusteredWoundNo                      | Binary       |
| ClusteredWoundYes                     | Binary       |
| PendingAmputationOnPresentationNo     | Binary       |
| PendingAmputationOnPresentationYes    | Binary       |
| GranulationQualityPaleNo              | Binary       |
| GranulationQualityPaleYes             | Binary       |
| GranulationQualityPinkNo              | Binary       |
| GranulationQualityPinkYes             | Binary       |
| GranulationQualityRedNo               | Binary       |
| GranulationQualityRedYes              | Binary       |
| GranulationAmountLarge (67-100%)      | Binary       |
| GranulationAmountMedium (34-66%)      | Binary       |
| GranulationAmountNone Present (0%)    | Binary       |
| GranulationAmountSmall (1-33%)        | Binary       |
| NormalizedPrimaryInsuranceMEDICAID    | Binary       |
| NormalizedPrimaryInsuranceMEDICARE    | Binary       |
| NormalizedPrimaryInsurancePRIVATE     | Binary       |
| NormalizedPrimaryInsuranceUNINSURED   | Binary       |
| NormalizedSecondaryInsuranceMEDICAID  | Binary       |
| NormalizedSecondaryInsuranceMEDICARE  | Binary       |
| NormalizedSecondaryInsurancePRIVATE   | Binary       |
| NormalizedSecondaryInsuranceUNINSURED | Binary       |
| NumWounds                             | Quantitative |
| SumArea                               | Quantitative |

|                      |              |
|----------------------|--------------|
| ProdArea             | Quantitative |
| SumLength            | Quantitative |
| ProdLength           | Quantitative |
| SumWidth             | Quantitative |
| ProdWidth            | Quantitative |
| SumDepth             | Quantitative |
| ProdDepth            | Quantitative |
| SumCalculatedArea    | Quantitative |
| PreviousOutlier      | Quantitative |
| PreviousOutlierCount | Quantitative |
| PreviousMaxDuration  | Quantitative |
| PreviousWoundCount   | Quantitative |
| PreviousMeanDuration | Quantitative |
| Previous75thDuration | Quantitative |
| short.ICD9.707TRUE   | Binary       |
| short.ICD9.249TRUE   | Binary       |
| short.ICD9.250TRUE   | Binary       |
| short.ICD9.440TRUE   | Binary       |
| short.ICD9.459TRUE   | Binary       |
| short.ICD9.998TRUE   | Binary       |
| short.ICD9.909TRUE   | Binary       |
| short.ICD9.906TRUE   | Binary       |
| short.ICD9.945TRUE   | Binary       |
| short.ICD9.996TRUE   | Binary       |
| short.ICD9.730TRUE   | Binary       |
| short.ICD9.287TRUE   | Binary       |
| short.ICD9.990TRUE   | Binary       |
| short.ICD9.879TRUE   | Binary       |
| short.ICD9.356TRUE   | Binary       |
| short.ICD9.682TRUE   | Binary       |
| short.ICD9.401TRUE   | Binary       |
| short.ICD9.735TRUE   | Binary       |
| short.ICD9.174TRUE   | Binary       |
| short.ICD9.198TRUE   | Binary       |
| short.ICD9.875TRUE   | Binary       |
| short.ICD9.288TRUE   | Binary       |
| short.ICD9.428TRUE   | Binary       |
| short.ICD9.780TRUE   | Binary       |
| short.ICD9.729TRUE   | Binary       |
| short.ICD9.V49TRUE   | Binary       |
| short.ICD9.338TRUE   | Binary       |

|                     |        |
|---------------------|--------|
| short.ICD9.443TRUE  | Binary |
| short.ICD9.496TRUE  | Binary |
| short.ICD9.244TRUE  | Binary |
| short.ICD9.272TRUE  | Binary |
| short.ICD9.274TRUE  | Binary |
| short.ICD9.530TRUE  | Binary |
| short.ICD9.883TRUE  | Binary |
| short.ICD9.891TRUE  | Binary |
| short.ICD9.276TRUE  | Binary |
| short.ICD9.560TRUE  | Binary |
| short.ICD9.584TRUE  | Binary |
| short.ICD9.700TRUE  | Binary |
| short.ICD9.959TRUE  | Binary |
| short.ICD9.278TRUE  | Binary |
| short.ICD9.457TRUE  | Binary |
| short.ICD9.714TRUE  | Binary |
| short.ICD9.942TRUE  | Binary |
| short.ICD9.E924TRUE | Binary |
| short.ICD9.585TRUE  | Binary |
| short.ICD9.518TRUE  | Binary |
| short.ICD9.403TRUE  | Binary |
| short.ICD9.458TRUE  | Binary |
| short.ICD9.611TRUE  | Binary |
| short.ICD9.414TRUE  | Binary |
| short.ICD9.715TRUE  | Binary |
| short.ICD9.V45TRUE  | Binary |
| short.ICD9.880TRUE  | Binary |
| short.ICD9.V58TRUE  | Binary |
| short.ICD9.332TRUE  | Binary |
| short.ICD9.427TRUE  | Binary |
| short.ICD9.486TRUE  | Binary |
| short.ICD9.789TRUE  | Binary |
| short.ICD9.882TRUE  | Binary |
| short.ICD9.997TRUE  | Binary |
| short.ICD9.433TRUE  | Binary |
| short.ICD9.787TRUE  | Binary |
| short.ICD9.823TRUE  | Binary |
| short.ICD9.709TRUE  | Binary |
| short.ICD9.355TRUE  | Binary |
| short.ICD9.943TRUE  | Binary |
| short.ICD9.944TRUE  | Binary |



|                     |        |
|---------------------|--------|
| short.ICD9.782TRUE  | Binary |
| short.ICD9.305TRUE  | Binary |
| short.ICD9.681TRUE  | Binary |
| short.ICD9.V12TRUE  | Binary |
| short.ICD9.263TRUE  | Binary |
| short.ICD9.491TRUE  | Binary |
| short.ICD9.V15TRUE  | Binary |
| short.ICD9.892TRUE  | Binary |
| short.ICD9.344TRUE  | Binary |
| short.ICD9.296TRUE  | Binary |
| short.ICD9.038TRUE  | Binary |
| short.ICD9.731TRUE  | Binary |
| short.ICD9.E929TRUE | Binary |
| short.ICD9.110TRUE  | Binary |
| short.ICD9.701TRUE  | Binary |
| short.ICD9.703TRUE  | Binary |
| short.ICD9.357TRUE  | Binary |
| short.ICD9.599TRUE  | Binary |
| short.ICD9.285TRUE  | Binary |
| short.ICD9.569TRUE  | Binary |
| short.ICD9.094TRUE  | Binary |
| short.ICD9.713TRUE  | Binary |
| short.ICD9.V85TRUE  | Binary |
| short.ICD9.345TRUE  | Binary |
| short.ICD9.785TRUE  | Binary |
| short.ICD9.719TRUE  | Binary |
| short.ICD9.571TRUE  | Binary |
| short.ICD9.039TRUE  | Binary |
| short.ICD9.881TRUE  | Binary |
| short.ICD9.353TRUE  | Binary |
| short.ICD9.V10TRUE  | Binary |
| short.ICD9.741TRUE  | Binary |
| short.ICD9.757TRUE  | Binary |
| short.ICD9.E878TRUE | Binary |
| short.ICD9.784TRUE  | Binary |
| short.ICD9.790TRUE  | Binary |
| short.ICD9.723TRUE  | Binary |
| short.ICD9.E905TRUE | Binary |
| short.ICD9.286TRUE  | Binary |
| short.ICD9.786TRUE  | Binary |
| short.ICD9.799TRUE  | Binary |

|                     |        |
|---------------------|--------|
| short.ICD9.884TRUE  | Binary |
| short.ICD9.874TRUE  | Binary |
| short.ICD9.736TRUE  | Binary |
| short.ICD9.928TRUE  | Binary |
| short.ICD9.E928TRUE | Binary |
| short.ICD9.008TRUE  | Binary |
| short.ICD9.280TRUE  | Binary |
| short.ICD9.187TRUE  | Binary |
| short.ICD9.553TRUE  | Binary |
| short.ICD9.041TRUE  | Binary |
| short.ICD9.451TRUE  | Binary |
| short.ICD9.454TRUE  | Binary |
| short.ICD9.453TRUE  | Binary |
| short.ICD9.578TRUE  | Binary |
| short.ICD9.300TRUE  | Binary |
| short.ICD9.311TRUE  | Binary |
| short.ICD9.204TRUE  | Binary |
| short.ICD9.989TRUE  | Binary |
| short.ICD9.692TRUE  | Binary |
| short.ICD9.574TRUE  | Binary |
| short.ICD9.916TRUE  | Binary |
| short.ICD9.824TRUE  | Binary |
| short.ICD9.593TRUE  | Binary |
| short.ICD9.705TRUE  | Binary |
| short.ICD9.897TRUE  | Binary |
| short.ICD9.E906TRUE | Binary |
| short.ICD9.920TRUE  | Binary |
| short.ICD9.958TRUE  | Binary |
| short.ICD9.281TRUE  | Binary |
| short.ICD9.492TRUE  | Binary |
| short.ICD9.493TRUE  | Binary |
| short.ICD9.564TRUE  | Binary |
| short.ICD9.E888TRUE | Binary |
| short.ICD9.816TRUE  | Binary |
| short.ICD9.E916TRUE | Binary |
| short.ICD9.275TRUE  | Binary |
| short.ICD9.948TRUE  | Binary |
| short.ICD9.273TRUE  | Binary |
| short.ICD9.923TRUE  | Binary |
| short.ICD9.V22TRUE  | Binary |
| short.ICD9.438TRUE  | Binary |

|                     |        |
|---------------------|--------|
| short.ICD9.294TRUE  | Binary |
| short.ICD9.695TRUE  | Binary |
| short.ICD9.724TRUE  | Binary |
| short.ICD9.070TRUE  | Binary |
| short.ICD9.V08TRUE  | Binary |
| short.ICD9.040TRUE  | Binary |
| short.ICD9.893TRUE  | Binary |
| short.ICD9.727TRUE  | Binary |
| short.ICD9.733TRUE  | Binary |
| short.ICD9.E816TRUE | Binary |
| short.ICD9.246TRUE  | Binary |
| short.ICD9.710TRUE  | Binary |
| short.ICD9.202TRUE  | Binary |
| short.ICD9.913TRUE  | Binary |
| short.ICD9.995TRUE  | Binary |
| short.ICD9.706TRUE  | Binary |
| short.ICD9.908TRUE  | Binary |
| short.ICD9.722TRUE  | Binary |
| short.ICD9.737TRUE  | Binary |
| short.ICD9.873TRUE  | Binary |
| short.ICD9.112TRUE  | Binary |
| short.ICD9.337TRUE  | Binary |
| short.ICD9.716TRUE  | Binary |
| short.ICD9.V44TRUE  | Binary |
| short.ICD9.894TRUE  | Binary |
| short.ICD9.340TRUE  | Binary |
| short.ICD9.890TRUE  | Binary |
| short.ICD9.173TRUE  | Binary |
| short.ICD9.685TRUE  | Binary |
| short.ICD9.586TRUE  | Binary |
| short.ICD9.331TRUE  | Binary |
| short.ICD9.V42TRUE  | Binary |
| short.ICD9.917TRUE  | Binary |
| short.ICD9.877TRUE  | Binary |
| short.ICD9.555TRUE  | Binary |
| short.ICD9.718TRUE  | Binary |
| short.ICD9.279TRUE  | Binary |
| short.ICD9.788TRUE  | Binary |
| short.ICD9.V46TRUE  | Binary |
| short.ICD9.905TRUE  | Binary |
| short.ICD9.V67TRUE  | Binary |

|                    |        |
|--------------------|--------|
| short.ICD9.728TRUE | Binary |
| short.ICD9.150TRUE | Binary |
| short.ICD9.686TRUE | Binary |
| short.ICD9.878TRUE | Binary |
| short.ICD9.690TRUE | Binary |
| short.ICD9.726TRUE | Binary |
| short.ICD9.027TRUE | Binary |
| short.ICD9.251TRUE | Binary |
| short.ICD9.362TRUE | Binary |
| short.ICD9.910TRUE | Binary |
| short.ICD9.912TRUE | Binary |
| short.ICD9.924TRUE | Binary |
| short.ICD9.526TRUE | Binary |
| short.ICD9.290TRUE | Binary |
| short.ICD9.162TRUE | Binary |
| short.ICD9.185TRUE | Binary |
| short.ICD9.473TRUE | Binary |
| short.ICD9.680TRUE | Binary |
| short.ICD9.583TRUE | Binary |
| short.ICD9.674TRUE | Binary |
| short.ICD9.876TRUE | Binary |
| short.ICD9.759TRUE | Binary |
| short.ICD9.927TRUE | Binary |
| short.ICD9.993TRUE | Binary |
| short.ICD9.172TRUE | Binary |
| short.ICD9.V05TRUE | Binary |
| short.ICD9.380TRUE | Binary |
| short.ICD9.381TRUE | Binary |
| short.ICD9.465TRUE | Binary |
| short.ICD9.536TRUE | Binary |
| short.ICD9.389TRUE | Binary |
| short.ICD9.042TRUE | Binary |
| short.ICD9.608TRUE | Binary |
| short.ICD9.447TRUE | Binary |
| short.ICD9.268TRUE | Binary |
| short.ICD9.189TRUE | Binary |
| short.ICD9.214TRUE | Binary |
| short.ICD9.343TRUE | Binary |
| short.ICD9.135TRUE | Binary |
| short.ICD9.886TRUE | Binary |
| short.ICD9.208TRUE | Binary |

|                     |        |
|---------------------|--------|
| short.ICD9.698TRUE  | Binary |
| short.ICD9.915TRUE  | Binary |
| short.ICD9.696TRUE  | Binary |
| short.ICD9.684TRUE  | Binary |
| short.ICD9.845TRUE  | Binary |
| short.ICD9.262TRUE  | Binary |
| short.ICD9.327TRUE  | Binary |
| short.ICD9.V02TRUE  | Binary |
| short.ICD9.V77TRUE  | Binary |
| short.ICD9.269TRUE  | Binary |
| short.ICD9.053TRUE  | Binary |
| short.ICD9.783TRUE  | Binary |
| short.ICD9.412TRUE  | Binary |
| short.ICD9.616TRUE  | Binary |
| short.ICD9.054TRUE  | Binary |
| short.ICD9.V55TRUE  | Binary |
| short.ICD9.941TRUE  | Binary |
| short.ICD9.E933TRUE | Binary |
| short.ICD9.256TRUE  | Binary |
| short.ICD9.239TRUE  | Binary |
| short.ICD9.477TRUE  | Binary |
| short.ICD9.844TRUE  | Binary |
| short.ICD9.E885TRUE | Binary |
| short.ICD9.946TRUE  | Binary |
| short.ICD9.922TRUE  | Binary |
| short.ICD9.270TRUE  | Binary |
| short.ICD9.404TRUE  | Binary |
| short.ICD9.295TRUE  | Binary |
| short.ICD9.533TRUE  | Binary |
| short.ICD9.596TRUE  | Binary |
| short.ICD9.429TRUE  | Binary |
| short.ICD9.704TRUE  | Binary |
| short.ICD9.590TRUE  | Binary |
| short.ICD9.756TRUE  | Binary |
| short.ICD9.V09TRUE  | Binary |
| short.ICD9.289TRUE  | Binary |
| short.ICD9.435TRUE  | Binary |
| short.ICD9.537TRUE  | Binary |
| short.ICD9.436TRUE  | Binary |
| short.ICD9.573TRUE  | Binary |
| short.ICD9.444TRUE  | Binary |

|                    |        |
|--------------------|--------|
| short.ICD9.478TRUE | Binary |
| short.ICD9.805TRUE | Binary |
| short.ICD9.413TRUE | Binary |
| short.ICD9.415TRUE | Binary |
| short.ICD9.183TRUE | Binary |
| short.ICD9.528TRUE | Binary |
| short.ICD9.336TRUE | Binary |
| short.ICD9.903TRUE | Binary |
| short.ICD9.693TRUE | Binary |
| short.ICD9.926TRUE | Binary |
| short.ICD9.929TRUE | Binary |
| short.ICD9.203TRUE | Binary |
| short.ICD9.045TRUE | Binary |
| short.ICD9.233TRUE | Binary |
| short.ICD9.348TRUE | Binary |
| short.ICD9.595TRUE | Binary |
| short.ICD9.904TRUE | Binary |
| short.ICD9.796TRUE | Binary |
| short.ICD9.317TRUE | Binary |
| short.ICD9.758TRUE | Binary |
| short.ICD9.441TRUE | Binary |
| short.ICD9.117TRUE | Binary |
| short.ICD9.424TRUE | Binary |
| short.ICD9.160TRUE | Binary |
| short.ICD9.319TRUE | Binary |
| short.ICD9.366TRUE | Binary |
| short.ICD9.919TRUE | Binary |
| short.ICD9.388TRUE | Binary |
| short.ICD9.510TRUE | Binary |
| short.ICD9.365TRUE | Binary |
| short.ICD9.303TRUE | Binary |
| short.ICD9.572TRUE | Binary |
| short.ICD9.812TRUE | Binary |
| short.ICD9.781TRUE | Binary |
| short.ICD9.351TRUE | Binary |
| short.ICD9.600TRUE | Binary |
| short.ICD9.826TRUE | Binary |
| short.ICD9.416TRUE | Binary |
| short.ICD9.746TRUE | Binary |
| short.ICD9.V13TRUE | Binary |
| short.ICD9.225TRUE | Binary |

|                     |        |
|---------------------|--------|
| short.ICD9.309TRUE  | Binary |
| short.ICD9.683TRUE  | Binary |
| short.ICD9.838TRUE  | Binary |
| short.ICD9.253TRUE  | Binary |
| short.ICD9.466TRUE  | Binary |
| short.ICD9.310TRUE  | Binary |
| short.ICD9.755TRUE  | Binary |
| short.ICD9.E927TRUE | Binary |
| short.ICD9.154TRUE  | Binary |
| short.ICD9.566TRUE  | Binary |
| short.ICD9.562TRUE  | Binary |
| short.ICD9.642TRUE  | Binary |
| short.ICD9.721TRUE  | Binary |
| short.ICD9.188TRUE  | Binary |
| short.ICD9.821TRUE  | Binary |
| short.ICD9.708TRUE  | Binary |
| short.ICD9.153TRUE  | Binary |
| short.ICD9.333TRUE  | Binary |
| short.ICD9.511TRUE  | Binary |
| short.ICD9.556TRUE  | Binary |
| short.ICD9.271TRUE  | Binary |
| short.ICD9.694TRUE  | Binary |
| short.ICD9.E985TRUE | Binary |
| short.ICD9.255TRUE  | Binary |
| short.ICD9.448TRUE  | Binary |
| short.ICD9.921TRUE  | Binary |
| short.ICD9.342TRUE  | Binary |
| short.ICD9.813TRUE  | Binary |
| short.ICD9.017TRUE  | Binary |
| short.ICD9.896TRUE  | Binary |
| short.ICD9.V56TRUE  | Binary |
| short.ICD9.306TRUE  | Binary |
| short.ICD9.521TRUE  | Binary |
| short.ICD9.195TRUE  | Binary |
| short.ICD9.171TRUE  | Binary |
| short.ICD9.691TRUE  | Binary |
| short.ICD9.170TRUE  | Binary |
| short.ICD9.277TRUE  | Binary |
| short.ICD9.238TRUE  | Binary |
| short.ICD9.297TRUE  | Binary |
| short.ICD9.949TRUE  | Binary |

|                    |        |
|--------------------|--------|
| short.ICD9.461TRUE | Binary |
| short.ICD9.369TRUE | Binary |
| short.ICD9.358TRUE | Binary |
| short.ICD9.111TRUE | Binary |
| short.ICD9.442TRUE | Binary |
| short.ICD9.382TRUE | Binary |
| short.ICD9.872TRUE | Binary |
| short.ICD9.753TRUE | Binary |
| short.ICD9.991TRUE | Binary |
| short.ICD9.911TRUE | Binary |
| short.ICD9.515TRUE | Binary |
| short.ICD9.304TRUE | Binary |
| short.ICD9.535TRUE | Binary |
| short.ICD9.592TRUE | Binary |
| short.ICD9.242TRUE | Binary |
| short.ICD9.432TRUE | Binary |
| short.ICD9.702TRUE | Binary |
| short.ICD9.601TRUE | Binary |
| short.ICD9.820TRUE | Binary |
| short.ICD9.725TRUE | Binary |
| short.ICD9.522TRUE | Binary |
| short.ICD9.314TRUE | Binary |
| short.ICD9.398TRUE | Binary |
| short.ICD9.402TRUE | Binary |
| short.ICD9.565TRUE | Binary |
| short.ICD9.299TRUE | Binary |
| short.ICD9.298TRUE | Binary |
| short.ICD9.994TRUE | Binary |
| short.ICD9.10TRUE  | Binary |
| short.ICD9.711TRUE | Binary |
| short.ICD9.794TRUE | Binary |
| short.ICD9.825TRUE | Binary |
| short.ICD9.742TRUE | Binary |
| short.ICD9.952TRUE | Binary |
| short.ICD9.237TRUE | Binary |
| short.ICD9.806TRUE | Binary |
| short.ICD9.437TRUE | Binary |
| short.ICD9.346TRUE | Binary |
| short.ICD9.252TRUE | Binary |
| short.ICD9.318TRUE | Binary |
| short.ICD9.078TRUE | Binary |



|                     |        |
|---------------------|--------|
| short.ICD9.157TRUE  | Binary |
| short.ICD9.445TRUE  | Binary |
| short.ICD9.455TRUE  | Binary |
| short.ICD9.607TRUE  | Binary |
| short.ICD9.176TRUE  | Binary |
| short.ICD9.141TRUE  | Binary |
| short.ICD9.149TRUE  | Binary |
| short.ICD9.914TRUE  | Binary |
| short.ICD9.260TRUE  | Binary |
| short.ICD9.577TRUE  | Binary |
| short.ICD9.864TRUE  | Binary |
| short.ICD9.216TRUE  | Binary |
| short.ICD9.136TRUE  | Binary |
| short.ICD9.852TRUE  | Binary |
| short.ICD9.199TRUE  | Binary |
| short.ICD9.999TRUE  | Binary |
| short.ICD9.261TRUE  | Binary |
| short.ICD9.895TRUE  | Binary |
| short.ICD9.228TRUE  | Binary |
| short.ICD9.359TRUE  | Binary |
| short.ICD9.E926TRUE | Binary |
| short.ICD9.284TRUE  | Binary |
| short.ICD9.E900TRUE | Binary |
| short.ICD9.E880TRUE | Binary |
| short.ICD9.E920TRUE | Binary |
| short.ICD9.434TRUE  | Binary |
| short.ICD9.354TRUE  | Binary |
| short.ICD9.282TRUE  | Binary |
| short.ICD9.E879TRUE | Binary |
| short.ICD9.144TRUE  | Binary |
| short.ICD9.529TRUE  | Binary |
| short.ICD9.734TRUE  | Binary |
| short.ICD9.V16TRUE  | Binary |
| short.ICD9.324TRUE  | Binary |
| short.ICD9.E922TRUE | Binary |
| short.ICD9.482TRUE  | Binary |
| short.ICD9.E814TRUE | Binary |
| short.ICD9.E901TRUE | Binary |
| short.ICD9.E988TRUE | Binary |
| short.ICD9.405TRUE  | Binary |
| short.ICD9.V14TRUE  | Binary |

|                       |        |
|-----------------------|--------|
| short.ICD9.V87TRUE    | Binary |
| short.ICD9.E934TRUE   | Binary |
| short.ICD9.V88TRUE    | Binary |
| short.ICD9.E819TRUE   | Binary |
| short.ICD9.301TRUE    | Binary |
| short.ICD9.E899TRUE   | Binary |
| short.ICD9.396TRUE    | Binary |
| short.ICD9.V43TRUE    | Binary |
| short.ICD9.E887TRUE   | Binary |
| short.ICD9.E013TRUE   | Binary |
| short.ICD9.V40TRUE    | Binary |
| short.ICD9.425TRUE    | Binary |
| short.ICD9.854TRUE    | Binary |
| short.ICD9.E955TRUE   | Binary |
| short.ICD9.V11TRUE    | Binary |
| `short.ICD9.V16`TRUE  | Binary |
| short.ICD9.E871TRUE   | Binary |
| short.ICD9.205TRUE    | Binary |
| short.ICD9.579TRUE    | Binary |
| short.ICD9.648TRUE    | Binary |
| short.ICD9.675TRUE    | Binary |
| short.ICD9.E893TRUE   | Binary |
| short.ICD9.E897TRUE   | Binary |
| short.ICD9.754TRUE    | Binary |
| short.ICD9.519TRUE    | Binary |
| short.ICD9.603TRUE    | Binary |
| short.ICD9.E917TRUE   | Binary |
| short.ICD9.031TRUE    | Binary |
| short.ICD9.E000TRUE   | Binary |
| short.ICD9.790.1.TRUE | Binary |
| short.ICD9.860TRUE    | Binary |
| short.ICD9.431TRUE    | Binary |
| short.ICD9.142TRUE    | Binary |
| short.ICD9.907TRUE    | Binary |
| short.ICD9.368TRUE    | Binary |
| short.ICD9.957TRUE    | Binary |
| short.ICD9.V54TRUE    | Binary |
| short.ICD9.862TRUE    | Binary |
| short.ICD9.446TRUE    | Binary |
| short.ICD9.E869TRUE   | Binary |
| short.ICD9.16020TRUE  | Binary |

|                     |        |
|---------------------|--------|
| short.ICD9.V65TRUE  | Binary |
| short.ICD9.266TRUE  | Binary |
| short.ICD9.240TRUE  | Binary |
| short.ICD9.395TRUE  | Binary |
| short.ICD9.E959TRUE | Binary |
| short.ICD9.E849TRUE | Binary |
| short.ICD9.146TRUE  | Binary |
| short.ICD9.V90TRUE  | Binary |
| short.ICD9.385TRUE  | Binary |
| short.ICD9.791TRUE  | Binary |
| short.ICD9.232TRUE  | Binary |
| short.ICD9.567TRUE  | Binary |
| short.ICD9.410TRUE  | Binary |
| short.ICD9.E919TRUE | Binary |
| short.ICD9.386TRUE  | Binary |
| short.ICD9.E821TRUE | Binary |
| short.ICD9.230TRUE  | Binary |
| short.ICD9.E848TRUE | Binary |
| short.ICD9.532TRUE  | Binary |
| short.ICD9.184TRUE  | Binary |
| short.ICD9.697TRUE  | Binary |
| short.ICD9.235TRUE  | Binary |
| short.ICD9.161TRUE  | Binary |
| short.ICD9.151TRUE  | Binary |
| short.ICD9.E918TRUE | Binary |
| short.ICD9.747TRUE  | Binary |
| short.ICD9.155TRUE  | Binary |
| short.ICD9.032TRUE  | Binary |
| short.ICD9.E030TRUE | Binary |
| short.ICD9.581TRUE  | Binary |
| short.ICD9.323TRUE  | Binary |
| short.ICD9.597TRUE  | Binary |
| short.ICD9.840TRUE  | Binary |
| short.ICD9.E930TRUE | Binary |
| short.ICD9.164TRUE  | Binary |
| short.ICD9.E001TRUE | Binary |
| short.ICD9.550TRUE  | Binary |
| short.ICD9.485TRUE  | Binary |
| short.ICD9.E884TRUE | Binary |
| short.ICD9.E870TRUE | Binary |
| short.ICD9.257TRUE  | Binary |

|                      |        |
|----------------------|--------|
| short.ICD9.516TRUE   | Binary |
| short.ICD9.E989TRUE  | Binary |
| short.ICD9.V18TRUE   | Binary |
| short.ICD9.133TRUE   | Binary |
| short.ICD9.797TRUE   | Binary |
| short.ICD9.E876TRUE  | Binary |
| short.ICD9.138TRUE   | Binary |
| short.ICD9.E015TRUE  | Binary |
| short.ICD9.720TRUE   | Binary |
| short.ICD9.863TRUE   | Binary |
| short.ICD9.E881TRUE  | Binary |
| short.ICD9.793TRUE   | Binary |
| short.ICD9.200TRUE   | Binary |
| short.ICD9.335TRUE   | Binary |
| short.ICD9.664TRUE   | Binary |
| short.ICD9.011TRUE   | Binary |
| short.ICD9.315TRUE   | Binary |
| short.ICD9.V84TRUE   | Binary |
| short.ICD9.210TRUE   | Binary |
| short.ICD9.V17TRUE   | Binary |
| short.ICD9.E006TRUE  | Binary |
| short.ICD9.558TRUE   | Binary |
| short.ICD9.512TRUE   | Binary |
| short.ICD9.955TRUE   | Binary |
| short.ICD9.191TRUE   | Binary |
| short.ICD9.588TRUE   | Binary |
| short.ICD9.372TRUE   | Binary |
| short.ICD9.330TRUE   | Binary |
| short.ICD9.950TRUE   | Binary |
| short.ICD9.V4975TRUE | Binary |
| short.ICD9.145TRUE   | Binary |
| short.ICD9.815TRUE   | Binary |
| short.ICD9.179TRUE   | Binary |
| short.ICD9.140TRUE   | Binary |
| short.ICD9.180TRUE   | Binary |
| short.ICD9.088TRUE   | Binary |
| short.ICD9.341TRUE   | Binary |
| short.ICD9.802TRUE   | Binary |
| short.ICD9.48TRUE    | Binary |
| short.ICD9.182TRUE   | Binary |
| short.ICD9.E898TRUE  | Binary |

|                     |              |
|---------------------|--------------|
| short.ICD9.E811TRUE | Binary       |
| short.ICD9.377TRUE  | Binary       |
| short.ICD9.196TRUE  | Binary       |
| short.ICD9.334TRUE  | Binary       |
| short.ICD9.738TRUE  | Binary       |
| short.ICD9.V07TRUE  | Binary       |
| short.ICD9.E890TRUE | Binary       |
| short.ICD9.808TRUE  | Binary       |
| short.ICD9.211TRUE  | Binary       |
| short.ICD9.E958TRUE | Binary       |
| short.ICD9.940TRUE  | Binary       |
| short.ICD9.956TRUE  | Binary       |
| short.ICD9.197TRUE  | Binary       |
| short.ICD9.215TRUE  | Binary       |
| short.ICD9.865TRUE  | Binary       |
| short.ICD9.E965TRUE | Binary       |
| short.ICD9.E925TRUE | Binary       |
| short.ICD9.887TRUE  | Binary       |
| short.ICD9.308TRUE  | Binary       |
| short.ICD9.810TRUE  | Binary       |
| short.ICD9.531TRUE  | Binary       |
| short.ICD9.079TRUE  | Binary       |
| short.ICD9.229TRUE  | Binary       |
| short.ICD9.488TRUE  | Binary       |
| short.ICD9.885TRUE  | Binary       |
| short.ICD9.156TRUE  | Binary       |
| short.ICD9.192TRUE  | Binary       |
| short.ICD9.E993TRUE | Binary       |
| short.ICD9.539TRUE  | Binary       |
| short.ICD9.V51TRUE  | Binary       |
| short.ICD9.625TRUE  | Binary       |
| short.ICD9.E997TRUE | Binary       |
| short.ICD9.847TRUE  | Binary       |
| short.ICD9.383TRUE  | Binary       |
| short.ICD9.732TRUE  | Binary       |
| short.ICD9.051TRUE  | Binary       |
| AbsDelta.iHealArea  | Quantitative |
| Fraction.iHealArea  | Quantitative |
| AbsDelta.SumArea    | Quantitative |
| Fraction.SumArea    | Quantitative |
| AbsDelta.ProdArea   | Quantitative |

|                                                  |              |
|--------------------------------------------------|--------------|
| Fraction.ProdArea                                | Quantitative |
| AbsDelta.SumLength                               | Quantitative |
| Fraction.SumLength                               | Quantitative |
| AbsDelta.ProdLength                              | Quantitative |
| Fraction.ProdLength                              | Quantitative |
| AbsDelta.SumWidth                                | Quantitative |
| Fraction.SumWidth                                | Quantitative |
| AbsDelta.ProdWidth                               | Quantitative |
| Fraction.ProdWidth                               | Quantitative |
| AbsDelta.SumCalculatedArea                       | Quantitative |
| Fraction.SumCalculatedArea                       | Quantitative |
| NormalizedWoundTypeAbscess                       | Binary       |
| NormalizedWoundTypeArterial Insufficiency Ulcer  | Binary       |
| NormalizedWoundTypeArterial Ulcer                | Binary       |
| NormalizedWoundTypeAtypical                      | Binary       |
| NormalizedWoundTypeBite                          | Binary       |
| NormalizedWoundTypeCalciphylaxis                 | Binary       |
| NormalizedWoundTypeClostridial Myonecrosis       | Binary       |
| NormalizedWoundTypeCompromised skin graft        | Binary       |
| NormalizedWoundTypeCyst                          | Binary       |
| NormalizedWoundTypeDiabetic wound                | Binary       |
| NormalizedWoundTypeDWLE                          | Binary       |
| NormalizedWoundTypeFrostbite                     | Binary       |
| NormalizedWoundTypeFull thickness burn           | Binary       |
| NormalizedWoundTypeGangrene of extremity         | Binary       |
| NormalizedWoundTypeInfection                     | Binary       |
| NormalizedWoundTypeInflammatory Ulcer            | Binary       |
| NormalizedWoundTypeInflammatory-Autoimmune       | Binary       |
| NormalizedWoundTypeLymphedema                    | Binary       |
| NormalizedWoundTypeMalignant wound               | Binary       |
| NormalizedWoundTypeMalignant Wound               | Binary       |
| NormalizedWoundTypeNecrotizing Fasciitis         | Binary       |
| NormalizedWoundTypeNeuro-ischemic diabetic wound | Binary       |
| NormalizedWoundTypeNeuropathic diabetic wound    | Binary       |
| NormalizedWoundTypeNo wound                      | Binary       |
| NormalizedWoundTypeNondiabetic neuropathic ulcer | Binary       |
| NormalizedWoundTypeOsteomyelitis                 | Binary       |
| NormalizedWoundTypeOther                         | Binary       |
| NormalizedWoundTypePartial thickness burn        | Binary       |
| NormalizedWoundTypePressure Ulcer                | Binary       |
| NormalizedWoundTypeRadiation                     | Binary       |

|                                                 |        |
|-------------------------------------------------|--------|
| NormalizedWoundTypeSickle Cell Ulcer            | Binary |
| NormalizedWoundTypeSurgical - Dehiscence        | Binary |
| NormalizedWoundTypeSurgical Wound               | Binary |
| NormalizedWoundTypeTo be determined             | Binary |
| NormalizedWoundTypeTrauma                       | Binary |
| NormalizedWoundTypeUlcer Secondary to Infection | Binary |
| NormalizedWoundTypeVasculitis                   | Binary |
| NormalizedWoundTypeVasculopathy                 | Binary |
| NormalizedWoundTypeVenous Insufficiency         | Binary |
| NormalizedWoundTypeVenous Leg Ulcer             | Binary |
| NormalizedWoundLocationAbdomen NOS              | Binary |
| NormalizedWoundLocationAmp Site                 | Binary |
| NormalizedWoundLocationAnkle                    | Binary |
| NormalizedWoundLocationAxilla                   | Binary |
| NormalizedWoundLocationBack                     | Binary |
| NormalizedWoundLocationBrain                    | Binary |
| NormalizedWoundLocationBreast                   | Binary |
| NormalizedWoundLocationButtocks                 | Binary |
| NormalizedWoundLocationCoccyx                   | Binary |
| NormalizedWoundLocationEar                      | Binary |
| NormalizedWoundLocationElbow                    | Binary |
| NormalizedWoundLocationFace                     | Binary |
| NormalizedWoundLocationFinger                   | Binary |
| NormalizedWoundLocationFoot                     | Binary |
| NormalizedWoundLocationForearm                  | Binary |
| NormalizedWoundLocationGroin                    | Binary |
| NormalizedWoundLocationHand                     | Binary |
| NormalizedWoundLocationHead                     | Binary |
| NormalizedWoundLocationIschium                  | Binary |
| NormalizedWoundLocationKnee                     | Binary |
| NormalizedWoundLocationLabia                    | Binary |
| NormalizedWoundLocationLower Leg                | Binary |
| NormalizedWoundLocationNeck                     | Binary |
| NormalizedWoundLocationOther                    | Binary |
| NormalizedWoundLocationPelvis                   | Binary |
| NormalizedWoundLocationPenis                    | Binary |
| NormalizedWoundLocationPerineum                 | Binary |
| NormalizedWoundLocationSacrum                   | Binary |
| NormalizedWoundLocationScrotum                  | Binary |
| NormalizedWoundLocationShoulder                 | Binary |
| NormalizedWoundLocationThigh                    | Binary |

|                                    |        |
|------------------------------------|--------|
| NormalizedWoundLocationThorax      | Binary |
| NormalizedWoundLocationToe         | Binary |
| NormalizedWoundLocationToe webbing | Binary |
| NormalizedWoundLocationUpper Arm   | Binary |
| NormalizedWoundLocationVagina      | Binary |
| NormalizedWoundLocationWrist       | Binary |
