# Supplementary material
Source: PubMed Central journal article supplement (PMC4820011)
Supplement: NIHMS769868-supplement-Supplement_2.pdf [file NIHMS769868-supplement-Supplement_2.pdf]

var rel.inf  
PalliativeCareYes 23.9170288602666  
Fraction.iHealArea 11.0895965718862  
Depth 7.03645066529301  
iHealArea 4.96187071353941  
AbsDelta.iHealArea 3.89656767223324  
GranulationQualityPaleNo 2.94337589690773  
PendingAmputationOnPresentationNo 2.76439561465685  
Fraction.SumCalculatedArea 2.65958105585477  
PatientAge 1.45729131563461  
Fraction.ProdArea 1.44267834682856  
Fraction.SumArea 1.31052219656765  
Fraction.ProdLength 1.22837426763272  
NormalizedWoundTypeTrauma 1.19117972504238  
NormalizedWoundLocationFoot 1.18597209903329  
NormalizedWoundTypeDWLE 1.16247687052511  
AbsDelta.SumCalculatedArea 1.01547309603779  
Fraction.ProdWidth 0.975910665282276  
Width 0.956184693071735  
ClusteredWoundNo 0.926005987198058  
NormalizedWoundLocationAnkle 0.899890269509657  
SumLength 0.890963472229768  
DelayedRecurrenceYes 0.801807848446503  
Fraction.SumLength 0.799034531537175  
Fraction.SumWidth 0.786160764006062  
Length 0.768354937897495  
WoundRecurrenceYes 0.727738481734935  
SumArea 0.708760283988001  
ProdDepth 0.660832843715205  
SumDepth 0.63315062094007  
SumCalculatedArea 0.618112595088057  
ComplexCareYes 0.604365894972813  
AbsDelta.SumArea 0.575882297721121  
ProdArea 0.565073277855615  
SumWidth 0.558449749367141  
AbsDelta.ProdLength 0.543394032794651  
AbsDelta.ProdWidth 0.519343239612435  
AbsDelta.ProdArea 0.50419693869202  
ScaleFull Thickness 0.493340794634714  
ProdLength 0.475177792533463  
AbsDelta.SumWidth 0.434296008162971  
NormalizedWoundTypePressure Ulcer 0.429942395291801  
ResultOfAccidentYes 0.407928338575871  
ProdWidth 0.403692169267375  
WoundRecurrenceNo 0.401429289874586  
TunnelingYes 0.336772652137202  
GranulationQualityPinkYes 0.328712211807546  
short.ICD9.250TRUE 0.326479873881435  
TendernessOnPalpationNo 0.316545200271914  
AbsDelta.SumLength 0.282244352964643  
GranulationQualityPaleYes 0.262782483025964  
short.ICD9.707TRUE 0.248581903000035  
ExudateAmountModerate 0.243072978587684

NumWounds 0.229644015724604  
SloughLessThan20N/A 0.224087012758011  
ExudateSerosanguineous 0.221496799199061  
NormalizedWoundTypeNeuropathic diabetic wound 0.203233491494995  
UnderminingN/A 0.203026042201433  
short.ICD9.682TRUE 0.201732680151187  
NormalizedWoundTypePartial thickness burn 0.19512003944798  
SloughLessThan20Yes 0.182246185494358  
GranulationQualityPinkNo 0.168388831706982  
ExudateSero-sanguineous 0.154186837422288  
ScaleGrade 2 0.152870037723789  
short.ICD9.318TRUE 0.150565699856454  
NormalizedWoundTypeSurgical Wound 0.144376933825478  
NormalizedWoundLocationIschium 0.143439105766539  
NormalizedWoundTypeRadiation 0.142942461043495  
NormalizedSecondaryInsuranceMEDICARE 0.138888067613195  
NormalizedWoundTypeArterial Ulcer 0.129309517160817  
NormalizedWoundTypeOsteomyelitis 0.128927735634651  
NormalizedWoundLocationCoccyx 0.111138244798033  
WoundMarginAttached to Wound Base 0.106733974679582  
NormalizedWoundTypeCompromised skin graft 0.10291705010179  
NormalizedWoundTypeVenous Leg Ulcer 0.0990687471998905  
UnderminingNo 0.0987118958417674  
NormalizedWoundLocationLower Leg 0.0947495164977633  
ScalePartial Thickness 0.0905891045526749  
ExudateAmountMedium 0.0886592096710754  
TemperatureHot 0.0864470958128751  
NormalizedSecondaryInsuranceUNINSURED 0.084215235248542  
NormalizedWoundTypeUlcer Secondary to Infection 0.0822245273957543  
CallusN/A 0.0790378340871291  
DelayedRecurrenceNo 0.0778813120216297  
NormalizedWoundLocationToe 0.0773759996711931  
NormalizedWoundTypeInflammatory Ulcer 0.0768801110221564  
TendernessOnPalpationYes 0.0722675342602812  
WoundMarginThickened 0.0720245855170463  
NormalizedSecondaryInsurancePRIVATE 0.0708944588142546  
short.ICD9.263TRUE 0.0703023394568316  
ExudateYellow/Green 0.0696838918017983  
WoundMarginThickened and Rolled Under 0.0683823896568435  
TemperatureNo Abnormality 0.0662594352629429  
ScaleFull Thickness Without Exposed Support Structures 0.0641911210214968  
NormalizedWoundTypeDiabetic wound 0.0633347237994696  
short.ICD9.070TRUE 0.0626796042639918  
NormalizedPrimaryInsuranceUNINSURED 0.0625345936791153  
WoundMarginFlat and Intact 0.0622198056624884  
NormalizedPrimaryInsuranceMEDICARE 0.0620063850662973  
short.ICD9.782TRUE 0.0612127395772039  
ResultOfAccidentNo 0.0608278899974809  
WoundMarginDistinct, outline attached 0.0605883650630967  
UnderminingYes 0.0594750212125169  
ScaleGrade 4 0.0591830452910784  
PatientGenderM 0.0576065588602585  
NormalizedPrimaryInsuranceMEDICAID 0.0574659600354938  
ScaleGrade 3 0.0570063867066087

NormalizedSecondaryInsuranceMEDICAID 0.0564041787698272  
ExposedBoneNo 0.056134041266247  
NormalizedWoundLocationOther 0.0533329963420108  
NormalizedPrimaryInsurancePRIVATE 0.0525578214632432  
ExudateAmountScant 0.0520022746455596  
NormalizedWoundTypeNeuro-ischemic diabetic wound 0.0518606240688028  
short.ICD9.952TRUE 0.0514655859872706  
short.ICD9.729TRUE 0.0513760157937668  
ExposedBoneN/A 0.0507385082601941  
NormalizedWoundLocationPelvis 0.0500359518679179  
PatientGenderF 0.0499159028269369  
BrawnyIndurationNo 0.047805105258443  
short.ICD9.730TRUE 0.0475279968474631  
GranulationQualityRedNo 0.0472968463729623  
short.ICD9.249TRUE 0.0472336857760687  
AtrophieBlancheN/A 0.0454726627624954  
NormalizedWoundLocationAmp Site 0.045147799976238  
ExposedMuscleN/A 0.0451221849631172  
TunnelingNo 0.0443722048666196  
short.ICD9.401TRUE 0.0440326767989212  
BrawnyIndurationYes 0.0421088079724777  
ExudateAmountNone Present 0.0417530424559487  
RuborN/A 0.041568598632356  
ExudateYellow 0.0413756309543653  
SloughLessThan20No 0.04100342172331  
PendingAmputationOnPresentationYes 0.040613932235122  
short.ICD9.998TRUE 0.0402010856269149  
short.ICD9.599TRUE 0.040082609624687  
short.ICD9.454TRUE 0.0400120683644491  
short.ICD9.273TRUE 0.0397835213409051  
short.ICD9.459TRUE 0.0397783160872494  
EpithializationNone 0.0390499000995249  
Epithialization26-50% 0.0382869087895338  
NormalizedWoundTypeAbscess 0.0377768844188278  
short.ICD9.553TRUE 0.0368496890680346  
short.ICD9.990TRUE 0.0362949314273256  
ScaleCategory/Stage IV 0.0354078232714152  
short.ICD9.440TRUE 0.0348024979582948  
ScaleGrade 1 0.0345121461086934  
ExudatePurulent 0.0344674154072186  
short.ICD9.441TRUE 0.0342100735023462  
ExudateAmountSmall 0.0340567852783267  
Epithialization76-100% 0.0332499150224456  
short.ICD9.344TRUE 0.0331403097937308  
short.ICD9.290TRUE 0.0330881066214534  
NormalizedWoundLocationForearm 0.0321903221752955  
GranulationAmountLarge (67-100%) 0.031381567455968  
short.ICD9.891TRUE 0.03099768425334  
short.ICD9.714TRUE 0.0308996896048458  
short.ICD9.340TRUE 0.0299270525141444  
EdemaYes 0.0295424377559608  
ExudateSerous 0.0293029370518485  
NormalizedWoundTypeVasculitis 0.029194853878085  
short.ICD9.457TRUE 0.0290112244257892

ExposedJointN/A 0.0282762943863103  
NormalizedWoundTypeSurgical - Dehiscence 0.0280462330545389  
NormalizedWoundLocationButtocks 0.0278167442379951  
short.ICD9.989TRUE 0.0277528574194456  
ExposedBoneYes 0.0270308147674008  
ExudateAmountLarge 0.026630431370688  
short.ICD9.874TRUE 0.0264822261610544  
short.ICD9.783TRUE 0.0261047577381616  
short.ICD9.996TRUE 0.0256028494748987  
short.ICD9.473TRUE 0.0251836472026551  
short.ICD9.V67TRUE 0.0249488823774179  
NormalizedWoundLocationSacrum 0.0242758110991511  
WoundMarginWell Defined 0.0241171142814703  
ExudateSanguineous 0.0240245392863365  
WoundMarginIndistinct, non-visible 0.0230188809628939  
short.ICD9.E878TRUE 0.0227778220594691  
BrawnyIndurationN/A 0.022730340071559  
ErythemaYes 0.0224590551421832  
short.ICD9.427TRUE 0.0224055984013792  
WoundMarginNot Attached to Wound Base 0.0222239143199728  
ErythemaNo 0.0217400141778114  
ExposedMuscleNo 0.0214609734109352  
HemosiderosisN/A 0.0210510873589744  
short.ICD9.892TRUE 0.0205082761908944  
EdemaNo 0.0203110731085877  
short.ICD9.V42TRUE 0.0199225838260502  
short.ICD9.493TRUE 0.0197935766266549  
short.ICD9.041TRUE 0.0195969411230706  
short.ICD9.780TRUE 0.019522788237589  
Epithialization1-25% 0.0194737613468992  
TemperatureCool/Cold 0.0193719395975219  
short.ICD9.414TRUE 0.0190790652945115  
NormalizedWoundTypeVenous Insufficiency 0.0190430361669605  
short.ICD9.945TRUE 0.018996457676122  
short.ICD9.332TRUE 0.0186360491196605  
short.ICD9.280TRUE 0.0185145115477469  
WoundMarginUndefined 0.0180266997000625  
short.ICD9.300TRUE 0.0179842074401168  
short.ICD9.443TRUE 0.017927404722736  
ScaleUnclassifiable 0.017526897157486  
NormalizedWoundTypeTo be determined 0.016918792694179  
ScaleCategory/Stage III 0.0167221838418626  
GranulationQualityRedYes 0.0163816716694629  
short.ICD9.278TRUE 0.016146157560319  
ExposedTendonN/A 0.0157331608570278  
NormalizedWoundTypeLymphedema 0.0155240316743853  
GranulationAmountSmall (1-33%) 0.0154093329207203  
short.ICD9.416TRUE 0.0153900513381619  
short.ICD9.269TRUE 0.0151591599616495  
NormalizedWoundLocationFinger 0.0151117894976497  
EdemaN/A 0.0148663802418171  
NormalizedWoundLocationUpper Arm 0.0148234410995379  
short.ICD9.785TRUE 0.0148088477166399  
ExudateAmountNone 0.0147603115782447

NormalizedWoundTypeInfection 0.0147016879263954  
 NormalizedWoundLocationThigh 0.0146677449909572  
 short.ICD9.705TRUE 0.0144371211636407  
 short.ICD9.342TRUE 0.0142642919317515  
 short.ICD9.781TRUE 0.0141833265254039  
 short.ICD9.110TRUE 0.014114033293212  
 short.ICD9.571TRUE 0.0140436153207183  
 ExposedJointNo 0.0138272398147353  
 short.ICD9.690TRUE 0.0135706881395907  
 ScaleUnstageable/Unclassified 0.012828397886762  
 ExposedTendonYes 0.0127760647041812  
 short.ICD9.429TRUE 0.0127510130449809  
 short.ICD9.877TRUE 0.0125708036910031  
 short.ICD9.428TRUE 0.0125095838919408  
 short.ICD9.881TRUE 0.0124597020689439  
 ExudateAmountCopious 0.0124370558443511  
 short.ICD9.202TRUE 0.0123963647714694  
 short.ICD9.879TRUE 0.0123190178473366  
 CallusYes 0.0122324736220236  
 short.ICD9.564TRUE 0.0121957887843837  
 ExposedJointYes 0.0120590340806537  
 ScaleCategory/Stage II 0.0118373851869262  
 short.ICD9.894TRUE 0.011674976900843  
 ErythemaN/A 0.0115006670000307  
 ExposedMuscleYes 0.0111233417370501  
 short.ICD9.402TRUE 0.0108868469669873  
 short.ICD9.V12TRUE 0.0106386965974145  
 short.ICD9.758TRUE 0.0105705846903972  
 WoundMarginWell defined, not attached 0.0104532014464145  
 RuborYes 0.0103747857929562  
 ClusteredWoundYes 0.0102938874326371  
 short.ICD9.305TRUE 0.0102754634018118  
 short.ICD9.444TRUE 0.0102372643291374  
 NormalizedWoundLocationScrotum 0.0102342056708353  
 short.ICD9.686TRUE 0.0101749691350568  
 NormalizedWoundTypeArterial Insufficiency Ulcer 0.01013830796016  
 short.ICD9.516TRUE 0.0100620581442714  
 ExposedTendonNo 0.00997561412295475  
 short.ICD9.V58TRUE 0.00980461676036598  
 short.ICD9.997TRUE 0.00970025894928905  
 short.ICD9.244TRUE 0.00965112264746151  
 ExcoriationN/A 0.00962112880877975  
 short.ICD9.681TRUE 0.00954289763761108  
 short.ICD9.447TRUE 0.00946309116020426  
 NormalizedWoundTypeInflammatory-Autoimmune 0.00934131419721047  
 HemosiderosisYes 0.00930020254835481  
 short.ICD9.357TRUE 0.0092920935178891  
 GranulationAmountNone Present (0%) 0.0092873592752686  
 short.ICD9.272TRUE 0.00884380644186518  
 short.ICD9.533TRUE 0.00861900473492718  
 short.ICD9.174TRUE 0.00851787802758224  
 short.ICD9.685TRUE 0.00851329222357106  
 WoundMarginIndistinct, nonvisible 0.00846202062515937  
 TunnelingN/A 0.00841852670905655

NormalizedWoundLocationBack 0.00841689642343756  
 ExcoriationYes 0.00840794817317547  
 short.ICD9.909TRUE 0.00839833837382121  
 short.ICD9.713TRUE 0.00821725054811519  
 short.ICD9.262TRUE 0.00794139964631586  
 short.ICD9.701TRUE 0.00769033424838628  
 short.ICD9.911TRUE 0.0075540690424621  
 short.ICD9.958TRUE 0.00745100919703295  
 GranulationAmountMedium (34-66%) 0.00734303840648513  
 short.ICD9.530TRUE 0.00732176481710777  
 short.ICD9.331TRUE 0.00711873797320393  
 WoundMarginEpibole 0.0070935782869248  
 short.ICD9.719TRUE 0.00703834056124805  
 WoundMarginFibrotic scar, thickened scar 0.00690977605807646  
 ScaleGrade 5 0.0068603224690835  
 short.ICD9.117TRUE 0.00676058634151558  
 WoundMarginFlattened 0.00673878478295373  
 short.ICD9.566TRUE 0.00667441061510325  
 NormalizedWoundTypeNondiabetic neuropathic ulcer 0.00665515957908014  
 short.ICD9.311TRUE 0.00658537128783842  
 short.ICD9.788TRUE 0.0065794947290609  
 short.ICD9.161TRUE 0.00653063262756793  
 NormalizedWoundTypeOther 0.00652811567672401  
 short.ICD9.303TRUE 0.0065272227142314  
 short.ICD9.741TRUE 0.00641248585192725  
 AtrophieBlancheYes 0.00635337257214585  
 ExudateFoul Purulent 0.00633426525568643  
 short.ICD9.V45TRUE 0.00629408358424501  
 short.ICD9.993TRUE 0.00628000265263973  
 short.ICD9.380TRUE 0.00604047495819371  
 short.ICD9.715TRUE 0.00602929406472325  
 CallusNo 0.00601402021348087  
 short.ICD9.754TRUE 0.00599914360501595  
 RuborNo 0.00586077452075411  
 short.ICD9.695TRUE 0.00584822898810455  
 short.ICD9.285TRUE 0.00581363138555421  
 short.ICD9.V55TRUE 0.00580107857752541  
 short.ICD9.355TRUE 0.00578600435151634  
 short.ICD9.343TRUE 0.00563680017126309  
 ScaleGrade 0 0.00554057225352361  
 short.ICD9.796TRUE 0.00547562253031017  
 short.ICD9.585TRUE 0.00527354714677446  
 short.ICD9.199TRUE 0.00519844836464051  
 NormalizedWoundLocationThorax 0.0050902062663967  
 NormalizedWoundTypeVasculopathy 0.00508613502758883  
 ExcoriationNo 0.0050007301482761  
 short.ICD9.E888TRUE 0.00485308901631244  
 CyanosisYes 0.0047562362529022  
 ExudateSanguinous 0.00472331781209809  
 short.ICD9.294TRUE 0.00471286862383101  
 NormalizedWoundLocationHand 0.00460736844769209  
 short.ICD9.786TRUE 0.00456421906993431  
 short.ICD9.825TRUE 0.0045326121772728  
 ExudateGreen 0.00444496284842683

ScaleFull Thickness With Exposed Support Structures 0.00440955171643804  
EcchymosisYes 0.00432100328035318  
short.ICD9.890TRUE 0.00426644253332875  
short.ICD9.596TRUE 0.00426149527188643  
EcchymosisNo 0.00423791458380725  
short.ICD9.345TRUE 0.00421933862532961  
short.ICD9.289TRUE 0.0041696049621599  
RashYes 0.00399817595036596  
short.ICD9.757TRUE 0.00393498917278087  
NormalizedWoundTypeFrostbite 0.00388452553950687  
short.ICD9.907TRUE 0.00386590282851005  
short.ICD9.205TRUE 0.00379595958470859  
NormalizedWoundLocationGroin 0.00379160964520806  
FriableYes 0.00376204351884904  
short.ICD9.V49TRUE 0.00374257517145092  
FriableNo 0.00371656431053721  
short.ICD9.586TRUE 0.00370765001980495  
FluctuanceN/A 0.00367052231030815  
short.ICD9.946TRUE 0.00363063361844299  
NormalizedWoundTypeGangrene of extremity 0.00359347179948542  
HemosiderosisNo 0.0035758898820902  
short.ICD9.893TRUE 0.00353377459019168  
PallorYes 0.00350414936330516  
short.ICD9.696TRUE 0.00331640715813745  
short.ICD9.731TRUE 0.00327790336801848  
ResultOfAccidentN/A 0.00323846016925409  
short.ICD9.921TRUE 0.00309352756667286  
short.ICD9.733TRUE 0.00306973082731024  
short.ICD9.492TRUE 0.00306223143130398  
FriableN/A 0.00306214412076908  
short.ICD9.556TRUE 0.00302420799624818  
EcchymosisN/A 0.00301797142123576  
NormalizedWoundLocationPerineum 0.00295803887433962  
short.ICD9.038TRUE 0.0029225605839183  
short.ICD9.V05TRUE 0.00282978524316436  
NormalizedWoundLocationBreast 0.00277178201759418  
NormalizedWoundLocationAbdomen NOS 0.00258413004663855  
NormalizedWoundLocationHead 0.00254513877484892  
Epithialization51-75% 0.0025442502914369  
short.ICD9.253TRUE 0.00249492916556941  
short.ICD9.823TRUE 0.00248032531459109  
short.ICD9.518TRUE 0.00244844744224361  
short.ICD9.296TRUE 0.00240597070103753  
short.ICD9.E849TRUE 0.00235800145929304  
short.ICD9.799TRUE 0.00229333665165474  
short.ICD9.337TRUE 0.00227960387032796  
short.ICD9.356TRUE 0.00227891621770643  
short.ICD9.V46TRUE 0.00227283462603981  
short.ICD9.700TRUE 0.00226879918234533  
short.ICD9.438TRUE 0.0022650447212454  
short.ICD9.562TRUE 0.00220703070811321  
short.ICD9.E917TRUE 0.00218951984735488  
short.ICD9.042TRUE 0.00208232710054059  
short.ICD9.173TRUE 0.00206482694860984

short.ICD9.403TRUE 0.00198028978927274  
ExudateFresh Blood 0.00193693407839022  
CrepitusYes 0.0018909327369811  
short.ICD9.453TRUE 0.00188272831362023  
short.ICD9.V02TRUE 0.00174450448040368  
short.ICD9.496TRUE 0.00173734989409118  
RashN/A 0.00173107867938996  
short.ICD9.904TRUE 0.00168180446975256  
short.ICD9.V15TRUE 0.00165575554088439  
short.ICD9.569TRUE 0.00164923481624578  
short.ICD9.583TRUE 0.00162349454503181  
short.ICD9.V14TRUE 0.00161424188890982  
short.ICD9.112TRUE 0.00157421617520668  
short.ICD9.790TRUE 0.00157202418648976  
short.ICD9.433TRUE 0.0015466655204628  
short.ICD9.274TRUE 0.00152925479551392  
NormalizedWoundLocationAxilla 0.00147716019843155  
short.ICD9.735TRUE 0.00146513273223515  
NormalizedWoundLocationKnee 0.00145941329262092  
short.ICD9.286TRUE 0.00145329526770759  
short.ICD9.369TRUE 0.00145267597478879  
AtrophieBlancheNo 0.00143945478542465  
short.ICD9.396TRUE 0.00143834150034593  
ScaleSuspected Deep Tissue Injury 0.00137274523356753  
short.ICD9.692TRUE 0.00136499407861771  
FluctuanceYes 0.0012330314306285  
PallorNo 0.00116391341830181  
short.ICD9.V13TRUE 0.00112779651893168  
short.ICD9.906TRUE 0.00112396598410993  
RashNo 0.00108177175019224  
NormalizedWoundTypeAtypical 0.00108072214323127  
short.ICD9.565TRUE 0.00107768211587121  
short.ICD9.154TRUE 0.0010752238091405  
short.ICD9.304TRUE 0.00105908324655545  
short.ICD9.991TRUE 0.00103045486634477  
short.ICD9.E885TRUE 0.00102380963507177  
short.ICD9.V85TRUE 0.00101087731159975  
short.ICD9.789TRUE 0.00100315563457221  
short.ICD9.878TRUE 0.000964211199665811  
NormalizedWoundTypeMalignant Wound 0.000936495890556651  
short.ICD9.362TRUE 0.000932134139217599  
short.ICD9.703TRUE 0.000897495048228562  
short.ICD9.338TRUE 0.000887655911647634  
short.ICD9.913TRUE 0.000877987851368465  
short.ICD9.V44TRUE 0.000855743522382991  
short.ICD9.787TRUE 0.000827656037639884  
short.ICD9.277TRUE 0.00081161460268336  
short.ICD9.880TRUE 0.000784687810631399  
short.ICD9.486TRUE 0.000762020258087565  
short.ICD9.680TRUE 0.00072271105259753  
short.ICD9.319TRUE 0.000690864223124508  
ScaleCategory/Stage I 0.000680517610125268  
short.ICD9.V10TRUE 0.000655915934771034  
short.ICD9.153TRUE 0.000651930263184184



short.ICD9.V09TRUE 0.00065095546578329  
short.ICD9.710TRUE 0.000650861017622144  
short.ICD9.728TRUE 0.000649134017252635  
NormalizedWoundLocationEar 0.000626352039092242  
short.ICD9.883TRUE 0.000606691893134087  
NormalizedWoundTypeBite 0.000560887134965562  
FluctuanceNo 0.00055107536827666  
short.ICD9.287TRUE 0.000539445627481623  
NormalizedWoundLocationVagina 0.000528036817675436  
WoundMarginIndistinct, nonvisible 0.000516640907824783  
NormalizedWoundLocationElbow 0.000488781122764264  
ExudateOther 0.000470760576408087  
CrepitusNo 0.000448440732117172  
CyanosisN/A 0.000422508849865071  
short.ICD9.694TRUE 0.000397885568480823  
short.ICD9.882TRUE 0.000384772817139089  
short.ICD9.897TRUE 0.000384149247339604  
short.ICD9.736TRUE 0.000373117413494049  
PallorN/A 0.000360321645114374  
short.ICD9.959TRUE 0.000338465340600444  
short.ICD9.183TRUE 0.000337563944619224  
short.ICD9.275TRUE 0.000327595386348698  
short.ICD9.327TRUE 0.000315985963536832  
short.ICD9.436TRUE 0.000295410451891911  
short.ICD9.724TRUE 0.00028205199854932  
short.ICD9.608TRUE 0.000277625521505056  
short.ICD9.716TRUE 0.000272771840476776  
short.ICD9.040TRUE 0.00025948021519996  
short.ICD9.718TRUE 0.000259428500577249  
short.ICD9.944TRUE 0.000258409441766789  
NormalizedWoundLocationNeck 0.000257280824391062  
short.ICD9.008TRUE 0.000235440476514699  
short.ICD9.698TRUE 0.000232027312373514  
short.ICD9.281TRUE 0.000225401591009235  
short.ICD9.E819TRUE 0.000212102591650229  
short.ICD9.246TRUE 0.000209137739631495  
short.ICD9.873TRUE 0.000205369825689396  
NormalizedWoundLocationFace 0.000205188494365974  
short.ICD9.172TRUE 0.000199698757647192  
short.ICD9.446TRUE 0.000198888798301015  
short.ICD9.924TRUE 0.000197831534341187  
short.ICD9.094TRUE 0.000190872569690097  
CyanosisNo 0.000158182065692357  
NormalizedWoundLocationToe webbing 0.000149577141802085  
short.ICD9.195TRUE 0.000142511634725276  
short.ICD9.908TRUE 0.000132054524880996  
short.ICD9.425TRUE 0.000129275117827645  
short.ICD9.697TRUE 0.000126251612924976  
WoundMarginLymphedema 0.000125852255831889  
short.ICD9.335TRUE 0.000119014051228901  
short.ICD9.251TRUE 0.000114243030618834  
short.ICD9.465TRUE 0.000102335682793828  
short.ICD9.155TRUE 9.95144678484568e-05  
short.ICD9.141TRUE 9.36657044323404e-05

PatientGenderU 0  
ScaleUnable to visualize wound bed 0  
WoundMarginPunched out 0  
CrepitusN/A 0  
Slough1-25% 0  
Slough26-50% 0  
Slough51-75% 0  
Slough76-100% 0  
SloughNone 0  
short.ICD9.198TRUE 0  
short.ICD9.875TRUE 0  
short.ICD9.288TRUE 0  
short.ICD9.276TRUE 0  
short.ICD9.560TRUE 0  
short.ICD9.584TRUE 0  
short.ICD9.942TRUE 0  
short.ICD9.E924TRUE 0  
short.ICD9.458TRUE 0  
short.ICD9.611TRUE 0  
short.ICD9.709TRUE 0  
short.ICD9.943TRUE 0  
short.ICD9.491TRUE 0  
short.ICD9.E929TRUE 0  
short.ICD9.039TRUE 0  
short.ICD9.353TRUE 0  
short.ICD9.784TRUE 0  
short.ICD9.723TRUE 0  
short.ICD9.E905TRUE 0  
short.ICD9.884TRUE 0  
short.ICD9.928TRUE 0  
short.ICD9.E928TRUE 0  
short.ICD9.187TRUE 0  
short.ICD9.451TRUE 0  
short.ICD9.578TRUE 0  
short.ICD9.204TRUE 0  
short.ICD9.574TRUE 0  
short.ICD9.916TRUE 0  
short.ICD9.824TRUE 0  
short.ICD9.593TRUE 0  
short.ICD9.E906TRUE 0  
short.ICD9.920TRUE 0  
short.ICD9.816TRUE 0  
short.ICD9.E916TRUE 0  
short.ICD9.948TRUE 0  
short.ICD9.923TRUE 0  
short.ICD9.V22TRUE 0  
short.ICD9.V08TRUE 0  
short.ICD9.727TRUE 0  
short.ICD9.E816TRUE 0  
short.ICD9.995TRUE 0  
short.ICD9.706TRUE 0  
short.ICD9.722TRUE 0  
short.ICD9.737TRUE 0  
short.ICD9.917TRUE 0

short.ICD9.555TRUE 0  
short.ICD9.279TRUE 0  
short.ICD9.905TRUE 0  
short.ICD9.150TRUE 0  
short.ICD9.726TRUE 0  
short.ICD9.027TRUE 0  
short.ICD9.910TRUE 0  
short.ICD9.912TRUE 0  
short.ICD9.526TRUE 0  
short.ICD9.162TRUE 0  
short.ICD9.185TRUE 0  
short.ICD9.674TRUE 0  
short.ICD9.876TRUE 0  
short.ICD9.759TRUE 0  
short.ICD9.927TRUE 0  
short.ICD9.381TRUE 0  
short.ICD9.536TRUE 0  
short.ICD9.389TRUE 0  
short.ICD9.268TRUE 0  
short.ICD9.189TRUE 0  
short.ICD9.214TRUE 0  
short.ICD9.135TRUE 0  
short.ICD9.886TRUE 0  
short.ICD9.208TRUE 0  
short.ICD9.915TRUE 0  
short.ICD9.684TRUE 0  
short.ICD9.845TRUE 0  
short.ICD9.V77TRUE 0  
short.ICD9.053TRUE 0  
short.ICD9.412TRUE 0  
short.ICD9.616TRUE 0  
short.ICD9.054TRUE 0  
short.ICD9.941TRUE 0  
short.ICD9.E933TRUE 0  
short.ICD9.256TRUE 0  
short.ICD9.239TRUE 0  
short.ICD9.477TRUE 0  
short.ICD9.844TRUE 0  
short.ICD9.922TRUE 0  
short.ICD9.270TRUE 0  
short.ICD9.404TRUE 0  
short.ICD9.295TRUE 0  
short.ICD9.704TRUE 0  
short.ICD9.590TRUE 0  
short.ICD9.756TRUE 0  
short.ICD9.435TRUE 0  
short.ICD9.537TRUE 0  
short.ICD9.573TRUE 0  
short.ICD9.478TRUE 0  
short.ICD9.805TRUE 0  
short.ICD9.413TRUE 0  
short.ICD9.415TRUE 0  
short.ICD9.528TRUE 0  
short.ICD9.336TRUE 0

short.ICD9.903TRUE 0  
short.ICD9.693TRUE 0  
short.ICD9.929TRUE 0  
short.ICD9.203TRUE 0  
short.ICD9.045TRUE 0  
short.ICD9.233TRUE 0  
short.ICD9.348TRUE 0  
short.ICD9.595TRUE 0  
short.ICD9.317TRUE 0  
short.ICD9.424TRUE 0  
short.ICD9.160TRUE 0  
short.ICD9.366TRUE 0  
short.ICD9.919TRUE 0  
short.ICD9.388TRUE 0  
short.ICD9.510TRUE 0  
short.ICD9.365TRUE 0  
short.ICD9.572TRUE 0  
short.ICD9.812TRUE 0  
short.ICD9.351TRUE 0  
short.ICD9.600TRUE 0  
short.ICD9.826TRUE 0  
short.ICD9.746TRUE 0  
short.ICD9.225TRUE 0  
short.ICD9.309TRUE 0  
short.ICD9.683TRUE 0  
short.ICD9.838TRUE 0  
short.ICD9.466TRUE 0  
short.ICD9.310TRUE 0  
short.ICD9.755TRUE 0  
short.ICD9.E927TRUE 0  
short.ICD9.642TRUE 0  
short.ICD9.721TRUE 0  
short.ICD9.188TRUE 0  
short.ICD9.821TRUE 0  
short.ICD9.708TRUE 0  
short.ICD9.333TRUE 0  
short.ICD9.511TRUE 0  
short.ICD9.271TRUE 0  
short.ICD9.E985TRUE 0  
short.ICD9.255TRUE 0  
short.ICD9.448TRUE 0  
short.ICD9.813TRUE 0  
short.ICD9.017TRUE 0  
short.ICD9.896TRUE 0  
short.ICD9.V56TRUE 0  
short.ICD9.306TRUE 0  
short.ICD9.521TRUE 0  
short.ICD9.171TRUE 0  
short.ICD9.691TRUE 0  
short.ICD9.170TRUE 0  
short.ICD9.238TRUE 0  
short.ICD9.297TRUE 0  
short.ICD9.949TRUE 0  
short.ICD9.461TRUE 0

short.ICD9.358TRUE 0  
short.ICD9.111TRUE 0  
short.ICD9.442TRUE 0  
short.ICD9.382TRUE 0  
short.ICD9.872TRUE 0  
short.ICD9.753TRUE 0  
short.ICD9.515TRUE 0  
short.ICD9.535TRUE 0  
short.ICD9.592TRUE 0  
short.ICD9.242TRUE 0  
short.ICD9.432TRUE 0  
short.ICD9.702TRUE 0  
short.ICD9.601TRUE 0  
short.ICD9.820TRUE 0  
short.ICD9.725TRUE 0  
short.ICD9.522TRUE 0  
short.ICD9.314TRUE 0  
short.ICD9.398TRUE 0  
short.ICD9.299TRUE 0  
short.ICD9.298TRUE 0  
short.ICD9.10TRUE 0  
short.ICD9.711TRUE 0  
short.ICD9.794TRUE 0  
short.ICD9.742TRUE 0  
short.ICD9.237TRUE 0  
short.ICD9.806TRUE 0  
short.ICD9.437TRUE 0  
short.ICD9.346TRUE 0  
short.ICD9.252TRUE 0  
short.ICD9.078TRUE 0  
short.ICD9.157TRUE 0  
short.ICD9.445TRUE 0  
short.ICD9.455TRUE 0  
short.ICD9.607TRUE 0  
short.ICD9.176TRUE 0  
short.ICD9.149TRUE 0  
short.ICD9.914TRUE 0  
short.ICD9.260TRUE 0  
short.ICD9.577TRUE 0  
short.ICD9.864TRUE 0  
short.ICD9.216TRUE 0  
short.ICD9.136TRUE 0  
short.ICD9.852TRUE 0  
short.ICD9.999TRUE 0  
short.ICD9.261TRUE 0  
short.ICD9.895TRUE 0  
short.ICD9.228TRUE 0  
short.ICD9.359TRUE 0  
short.ICD9.E926TRUE 0  
short.ICD9.284TRUE 0  
short.ICD9.E900TRUE 0  
short.ICD9.E880TRUE 0  
short.ICD9.E920TRUE 0  
short.ICD9.434TRUE 0

short.ICD9.354TRUE 0  
short.ICD9.282TRUE 0  
short.ICD9.E879TRUE 0  
short.ICD9.144TRUE 0  
short.ICD9.529TRUE 0  
short.ICD9.734TRUE 0  
short.ICD9.V16TRUE 0  
short.ICD9.324TRUE 0  
short.ICD9.E922TRUE 0  
short.ICD9.482TRUE 0  
short.ICD9.E814TRUE 0  
short.ICD9.E901TRUE 0  
short.ICD9.E988TRUE 0  
short.ICD9.405TRUE 0  
short.ICD9.V87TRUE 0  
short.ICD9.E934TRUE 0  
short.ICD9.V88TRUE 0  
short.ICD9.301TRUE 0  
short.ICD9.E899TRUE 0  
short.ICD9.V43TRUE 0  
short.ICD9.E887TRUE 0  
short.ICD9.E013TRUE 0  
short.ICD9.V40TRUE 0  
short.ICD9.854TRUE 0  
short.ICD9.V11TRUE 0  
`short.ICD9. V16` TRUE0  
short.ICD9.E871TRUE 0  
short.ICD9.579TRUE 0  
short.ICD9.648TRUE 0  
short.ICD9.675TRUE 0  
short.ICD9.E893TRUE 0  
short.ICD9.E897TRUE 0  
short.ICD9.519TRUE 0  
short.ICD9.031TRUE 0  
short.ICD9.E000TRUE 0  
short.ICD9.790.1.TRUE 0  
short.ICD9.860TRUE 0  
short.ICD9.431TRUE 0  
short.ICD9.142TRUE 0  
short.ICD9.368TRUE 0  
short.ICD9.957TRUE 0  
short.ICD9.V54TRUE 0  
short.ICD9.862TRUE 0  
short.ICD9.E869TRUE 0  
short.ICD9.16020TRUE 0  
short.ICD9.266TRUE 0  
short.ICD9.240TRUE 0  
short.ICD9.395TRUE 0  
short.ICD9.146TRUE 0  
short.ICD9.V90TRUE 0  
short.ICD9.385TRUE 0  
short.ICD9.791TRUE 0  
short.ICD9.232TRUE 0  
short.ICD9.567TRUE 0

short.ICD9.410TRUE 0  
short.ICD9.E919TRUE 0  
short.ICD9.386TRUE 0  
short.ICD9.E821TRUE 0  
short.ICD9.230TRUE 0  
short.ICD9.E848TRUE 0  
short.ICD9.532TRUE 0  
short.ICD9.184TRUE 0  
short.ICD9.235TRUE 0  
short.ICD9.151TRUE 0  
short.ICD9.E918TRUE 0  
short.ICD9.747TRUE 0  
short.ICD9.627TRUE 0  
short.ICD9.032TRUE 0  
short.ICD9.E030TRUE 0  
short.ICD9.581TRUE 0  
short.ICD9.323TRUE 0  
short.ICD9.840TRUE 0  
short.ICD9.E930TRUE 0  
short.ICD9.E001TRUE 0  
short.ICD9.550TRUE 0  
short.ICD9.485TRUE 0  
short.ICD9.E884TRUE 0  
short.ICD9.E870TRUE 0  
short.ICD9.257TRUE 0  
short.ICD9.E989TRUE 0  
short.ICD9.V18TRUE 0  
short.ICD9.133TRUE 0  
short.ICD9.797TRUE 0  
short.ICD9.E876TRUE 0  
short.ICD9.138TRUE 0  
short.ICD9.E015TRUE 0  
short.ICD9.720TRUE 0  
short.ICD9.863TRUE 0  
short.ICD9.E881TRUE 0  
short.ICD9.793TRUE 0  
short.ICD9.200TRUE 0  
short.ICD9.739TRUE 0  
short.ICD9.011TRUE 0  
short.ICD9.315TRUE 0  
short.ICD9.V84TRUE 0  
short.ICD9.210TRUE 0  
short.ICD9.V17TRUE 0  
short.ICD9.E006TRUE 0  
short.ICD9.558TRUE 0  
short.ICD9.512TRUE 0  
short.ICD9.955TRUE 0  
short.ICD9.191TRUE 0  
short.ICD9.588TRUE 0  
short.ICD9.372TRUE 0  
short.ICD9.330TRUE 0  
short.ICD9.950TRUE 0  
short.ICD9.V4975TRUE 0  
short.ICD9.145TRUE 0

short.ICD9.815TRUE 0  
short.ICD9.179TRUE 0  
short.ICD9.140TRUE 0  
short.ICD9.180TRUE 0  
short.ICD9.245TRUE 0  
short.ICD9.088TRUE 0  
short.ICD9.341TRUE 0  
short.ICD9.802TRUE 0  
short.ICD9.48TRUE 0  
short.ICD9.182TRUE 0  
short.ICD9.E898TRUE 0  
short.ICD9.E811TRUE 0  
short.ICD9.196TRUE 0  
short.ICD9.334TRUE 0  
short.ICD9.807TRUE 0  
short.ICD9.738TRUE 0  
short.ICD9.V07TRUE 0  
short.ICD9.E890TRUE 0  
short.ICD9.808TRUE 0  
short.ICD9.211TRUE 0  
short.ICD9.E958TRUE 0  
short.ICD9.940TRUE 0  
short.ICD9.956TRUE 0  
short.ICD9.197TRUE 0  
short.ICD9.215TRUE 0  
short.ICD9.865TRUE 0  
short.ICD9.E965TRUE 0  
short.ICD9.E925TRUE 0  
short.ICD9.887TRUE 0  
short.ICD9.308TRUE 0  
short.ICD9.810TRUE 0  
short.ICD9.531TRUE 0  
short.ICD9.629TRUE 0  
short.ICD9.079TRUE 0  
short.ICD9.229TRUE 0  
short.ICD9.488TRUE 0  
short.ICD9.885TRUE 0  
short.ICD9.156TRUE 0  
short.ICD9.192TRUE 0  
short.ICD9.E993TRUE 0  
short.ICD9.V51TRUE 0  
short.ICD9.E997TRUE 0  
short.ICD9.847TRUE 0  
short.ICD9.732TRUE 0  
NormalizedWoundTypeCalciphylaxis 0  
NormalizedWoundTypeClostridial Myonecrosis 0  
NormalizedWoundTypeCyst 0  
NormalizedWoundTypeFull thickness burn 0  
NormalizedWoundTypeMalignant wound 0  
NormalizedWoundTypeNecrotizing Fasciitis 0  
NormalizedWoundTypeNo wound0  
NormalizedWoundTypeSickle Cell Ulcer 0  
NormalizedWoundLocationBrain 0  
NormalizedWoundLocationLabia 0



NormalizedWoundLocationPenis 0  
NormalizedWoundLocationShoulder 0  
NormalizedWoundLocationWrist 0
